# Supplementary material
Source: MDPI journal article supplement (https://www.mdpi.com/2076-3417/9/12/2513)
Supplement: s1 [file s1]

## Supplementary

# Fabrication and analysis of a Ti6Al4V implant for cranial restoration

Khaja Moiduddin \*, Syed Hammad Mian, Usama Umer and Hisham Alkhalefah

Advanced Manufacturing Institute, King Saud University, Riyadh 11421, Saudi Arabia;  
syedhammad68@yahoo.co.in (S.H.M.), usamaumer@yahoo.com (U.U.), halkhalefah@ksu.edu.sa (H.A.)

\* Correspondence: kmoiduddin@gmail.com; Khussain1@ksu.edu.sa

Received: 25 May 2019; Accepted: 18 June 2019; Published: date

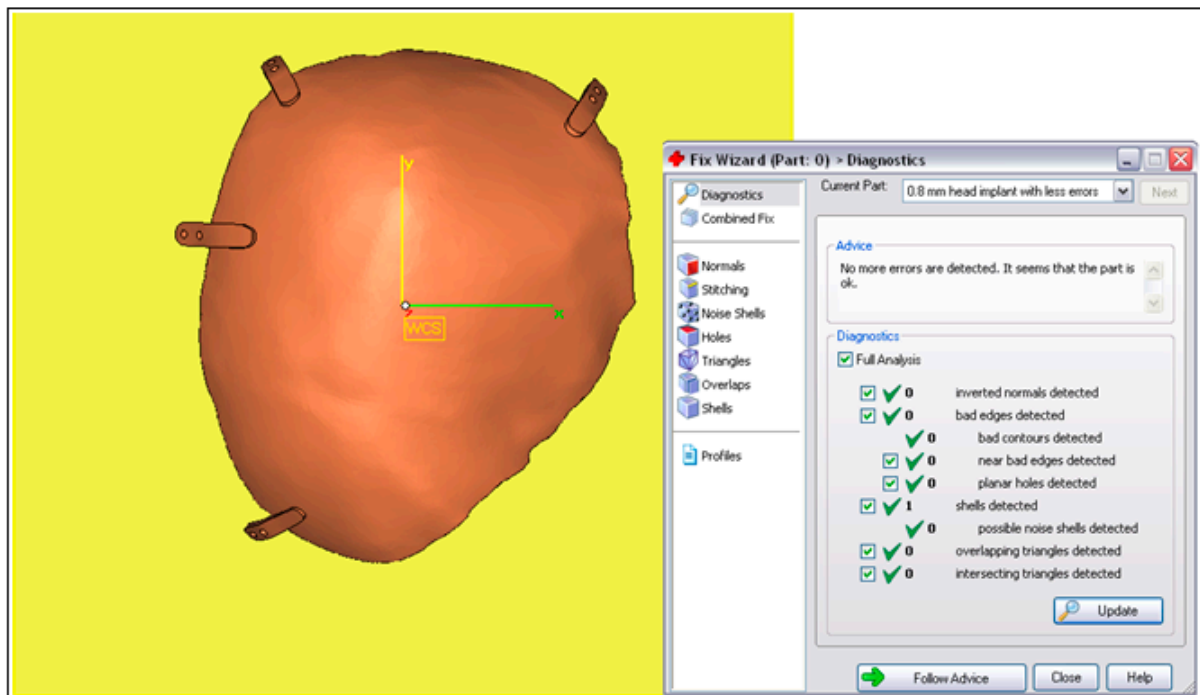

Figure S1. STL corrections performed on the cranial implant design.

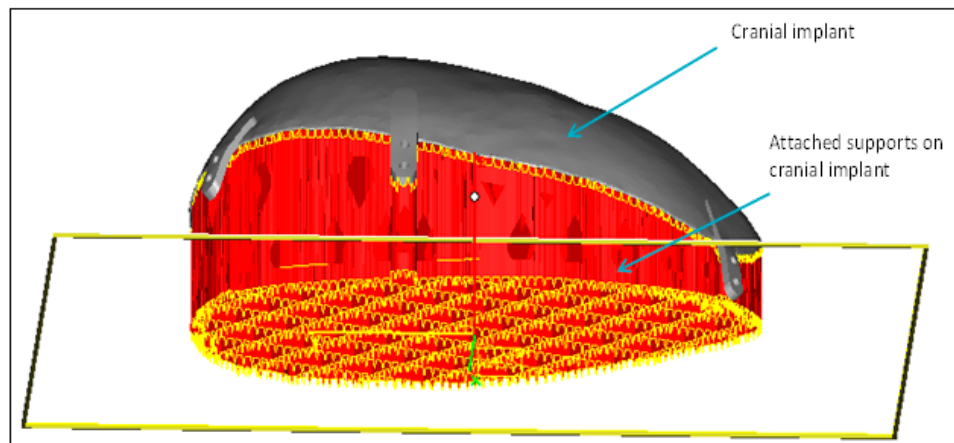

Figure S2. Generated supports on cranial implant.

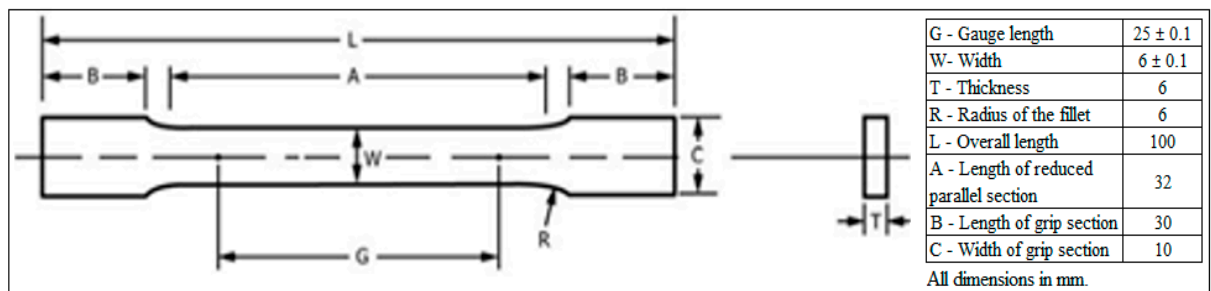

Figure S3. Dog bone shaped specimen to evaluate the tensile strength [39, 40].

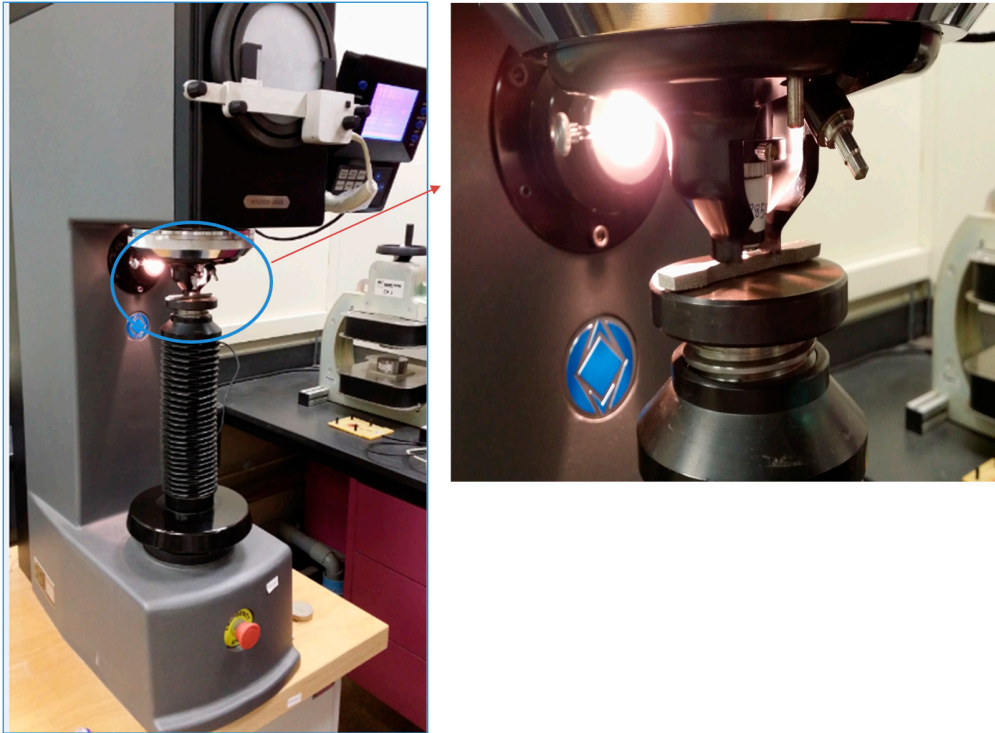

Figure S4. Rockwell hardness (HRC) test on EBM fabricated specimens.
